# Supplementary material for: Semantic discrimination impacts tDCS modulation of verb processing
Source: PubMed Central journal article supplement (PMC5719444; doi:10.1038/s41598-017-17326-w), 2017-12-07
Supplement: 41598_2017_17326_MOESM1_ESM.pdf [file 41598_2017_17326_MOESM1_ESM.pdf]

# Semantic discrimination impacts tDCS modulation of verb processing

Valentina Niccolai, Anne Klepp, Peter Indefrey, Alfons Schnitzler & Katja Biermann-Ruben

Supplementary Figure

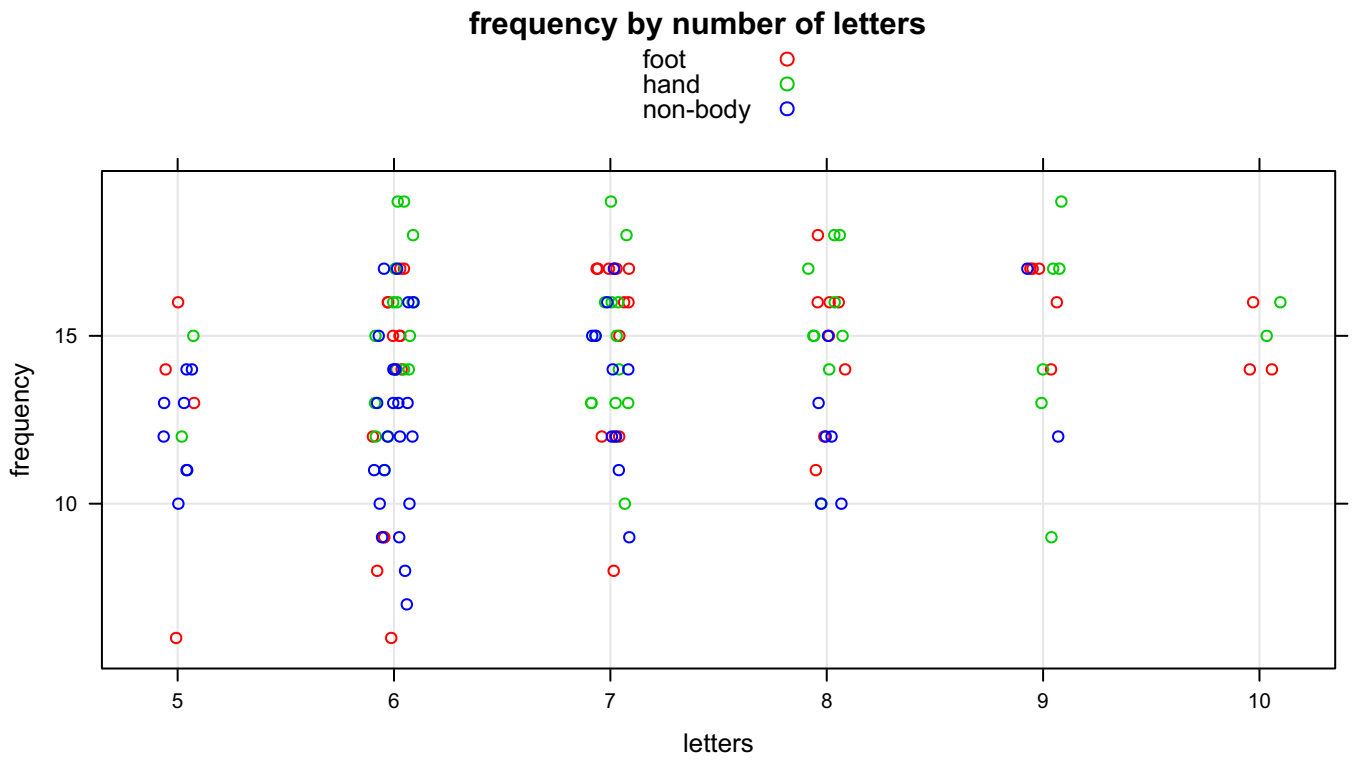

S1. Scatterplot depicting the stimuli from the three verb conditions (foot, hand, and non-body verbs) across the levels of word frequency and length. For visual clarity, data are plotted with a jitter on the x-axis to avoid point overlay.
